# Supplementary material for: A Dehydration-Induced Eukaryotic Translation Initiation Factor iso4G Identified in a Slow Wilting Soybean Cultivar Enhances Abiotic Stress Tolerance in Arabidopsis
Source: Front Plant Sci. 2018 Mar 2;9:262. doi: 10.3389/fpls.2018.00262 (PMC5840855; doi:10.3389/fpls.2018.00262)
Supplement: Supplementary file 4 [file Data_Sheet_3.XLSX]

## Sheet: Early response (50 % FC)
Table S3. Upregulated genes during the early response to drought.
Upregulated only in N7001
GlymaID	Functional annotation	Category
Glyma.01G099800	Glutamate-5-semialdehyde dehydrogenase / Glutamyl-gamma-semialdehyde dehydrogenase // Glutamate 5-kinase / Gamma-glutamyl kinase	Amino acid metabolism
Glyma.18G017200	Asparagine synthase (glutamine-hydrolyzing) / Glutamine-dependent asparagine synthetase	Amino acid metabolism
Glyma.01G099800	Glutamate-5-semialdehyde dehydrogenase / Glutamyl-gamma-semialdehyde dehydrogenase // Glutamate 5-kinase / Gamma-glutamyl kinase	Amino acid metabolism
Glyma.18G061100	Asparagine synthase (glutamine-hydrolyzing) / Glutamine-dependent asparagine synthetase	Amino acid metabolism
Glyma.03G069400	Glutamate-5-semialdehyde dehydrogenase/Glutamate 5-kinase	Amino acid metabolism
Glyma.01G019200	Phosphoenolpyruvate carboxykinase	Carbohydrate metabolism
Glyma.07G126400	Phosphofructokinase	Carbohydrate metabolism
Glyma.14G031000	Glutathione S-transferase, C-terminal domain	Detoxification
Glyma.20G150600	EARLY LIGHT-INDUCED PROTEIN 1, CHLOROPLASTIC-RELATED	Energy metabolism
Glyma.17G128100	Malate synthase	Energy metabolism
Glyma.17G128000	Malate synthase	Energy metabolism
Glyma.06G194900	Chlorophyll A-B binding protein	Energy metabolism
Glyma.13G119400	Late embryogenesis abundant protein	HSP, chaperones and cell protection
Glyma.17G164200	Late embryogenesis abundant protein 18	HSP, chaperones and cell protection
Glyma.13G224000	Hsp70 protein	HSP, chaperones and cell protection
Glyma.04G079600	DEHYDRATION-RESPONSIVE PROTEIN RD22	HSP, chaperones and cell protection
Glyma.16G037900	Dehydrin	HSP, chaperones and cell protection
Glyma.06G081100	DEHYDRATION-RESPONSIVE PROTEIN RD22	HSP, chaperones and cell protection
Glyma.09G185500	Dehydrin	HSP, chaperones and cell protection
Glyma.10G224300	ABA/WDS induced protein	HSP, chaperones and cell protection
Glyma.14G176900	14-3-3 protein	Macromolecule modification/kinases and phosphatases
Glyma.05G138400	Calcineurin-like phosphoesterase	Macromolecule modification/kinases and phosphatases
Glyma.05G138400	Calcineurin-like phosphoesterase	Macromolecule modification/kinases and phosphatases
Glyma.04G230300	Leucine Rich Repeat (LRR_1) // Protein tyrosine kinase (Pkinase_Tyr)	Macromolecule modification/kinases and phosphatases
Glyma.07G014500	HAD superfamily, subfamily IIIB (Acid phosphatase)	Macromolecule modification/kinases and phosphatases
Glyma.03G232500	Calmodulin binding protein-like	Macromolecule modification/kinases and phosphatases
Glyma.20G129900	Peptidase of plants and bacteria (BSP)	Macromolecule modification/proteases or protease inhibitors
Glyma.15G211500	Trypsin and Protease inhibitor	Macromolecule modification/proteases or protease inhibitors
Glyma.20G130000	Peptidase of plants and bacteria (BSP)	Macromolecule modification/proteases or protease inhibitors
Glyma.10G184700	Potato inhibitor I family	Macromolecule modification/proteases or protease inhibitors
Glyma.07G139400	Protease inhibitor/seed storage/LTP family	Macromolecule modification/proteases or protease inhibitors
Glyma.20G205800	Potato inhibitor I family	Macromolecule modification/proteases or protease inhibitors
Glyma.20G205700	Potato inhibitor I family	Macromolecule modification/proteases or protease inhibitors
Glyma.17G239000	CYSTEINE Protease FAMILY C1-RELATED	Macromolecule modification/protein degradation
Glyma.10G122100	Predicted RNA-binding protein (RRM superfamily)	Macromolecule modification/RNA binding
Glyma.20G204400	Sieve element occlusion	Miscellaneous
Glyma.10G185900	Sieve element occlusion	Miscellaneous
Glyma.20G204500	Sieve element occlusion	Miscellaneous
Glyma.20G204500	Sieve element occlusion	Miscellaneous
Glyma.11G082300	Rhodanese-like domain	Miscellaneous
Glyma.06G102700	OUTER ARM DYNEIN LIGHT CHAIN 1 PROTEIN	Motor activity and cytoeskeleton
Glyma.05G171800	FERRIC-CHELATE REDUCTASE 1-RELATED	Oxidation-reduction process
Glyma.01G219400	Glutathione peroxidase	Oxidation-reduction process
Glyma.06G021200	THIOREDOXIN	Oxidation-reduction process
Glyma.06G120600	Leucine Rich Repeat	Regulatory proteins
Glyma.20G018500	Calcyclin-binding protein CacyBP	Regulatory proteins
Glyma.06G051000	BRISC AND BRCA1-A COMPLEX MEMBER 1	Regulatory proteins
Glyma.16G174400	Leucine Rich Repeat	Regulatory proteins
Glyma.13G087300	zinc-finger of the FCS-type, C2-C2	Regulatory proteins
Glyma.11G228600	Yippee putative zinc-binding protein	Regulatory proteins
Glyma.04G002400	Mlo family	Regulatory proteins
Glyma.16G135200	Leucine Rich Repeat	Regulatory proteins
Glyma.03G209400	transport inhibitor response 1 (TIR1)	Regulatory proteins
Glyma.13G341000	AN1-like Zinc finger	Regulatory proteins
Glyma.10G236000	Armadillo/beta-catenin-like repeat	Regulatory proteins
Glyma.13G278000	DEFENSIN-LIKE PROTEIN 13-RELATED	Response to stress
Glyma.07G243500	Pathogenesis-related protein Bet v I family	Response to stress
Glyma.08G142400	WRKY DNA -binding domain	Transcription
Glyma.02G281000	ATP-DEPENDENT HELICASE SMARCA	Transcription
Glyma.08G360100	LIPOPOLYSACCHARIDE-INDUCED TRANSCRIPTION FACTOR REGULATING TUMOR NECROSIS FACTOR ALPHA	Transcription
Glyma.17G092700	Calmodulin binding protein-like	Transcription
Glyma.07G134400	STEP II SPLICING FACTOR SLU7	Transcription
Glyma.12G216100	GRAS family transcription factor	Transcription
Glyma.10G225200	DUPLICATED HOMEODOMAIN-LIKE SUPERFAMILY PROTEIN, Myb-like, SANT domain, GT-1 transcription factor	Transcription
Glyma.20G070000	AP2 domain	Transcription
Glyma.03G027900	GlycoProtease family	Translation
Glyma.06G302800	Translation initiation factor SUI1	Translation
Glyma.17G072500	MA3 domain	Translation
Glyma.13G088700	ANNEXIN D1-RELATED	Transport and catabolism
Glyma.04G198600	BIDIRECTIONAL SUGAR TRANSPORTER SWEET10	Transport and catabolism
Glyma.13G186600	Major Facilitator Superfamily	Transport and catabolism
Glyma.07G034700	Coatomer WD associated region	Transport and catabolism
Glyma.13G271400	NA	Unknown
Upregulated only in TJS2049
GlymaID		Category
Glyma.10G244100	Acireductone dioxygenase (Ni(2+)-requiring) / E-2	Amino acid metabolism
Glyma.02G282500	PsbP	Energy metabolism
Glyma.09G087700	Photosystem I psaG / psaK	Energy metabolism
Glyma.14G104700	CemA family	Energy metabolism
Glyma.05G128000	CHLOROPHYLL A-B BINDING PROTEIN 1, CHLOROPLASTIC-RELATED	Energy metabolism
Glyma.04G045100	CUE domain	Energy metabolism
Glyma.06G150300	Photosystem I reaction centre subunit N (PSAN or PSI-N)	Energy metabolism
Glyma.11G140500	Hsp70 protein	HSP, chaperones and cell protection
Glyma.02G266300	Dual specificity phosphatase, catalytic domain	Macromolecule modification/kinases and phosphatases
Glyma.05G244600	Protein tyrosine kinase	Macromolecule modification/kinases and phosphatases
Glyma.16G211700	DR4 PROTEIN-RELATED	Macromolecule modification/proteases or protease inhibitors
Glyma.10G143500	ASPARTYL ProteaseS	Macromolecule modification/proteases or protease inhibitors
Glyma.17G254900	Papain family cysteine Protease	Macromolecule modification/proteases or protease inhibitors
Glyma.14G216300	Papain family cysteine Protease	Macromolecule modification/proteases or protease inhibitors
Glyma.06G124900	Ubiquitin-conjugating enzyme	Macromolecule modification/protein degradation
Glyma.17G239000	CYSTEINE Protease FAMILY C1-RELATED	Macromolecule modification/protein degradation
Glyma.20G141600	Ubiquitin and ubiquitin-like proteins	Macromolecule modification/protein degradation
Glyma.02G143700	Methyltransferase domain	Metabolism of vitamins and cofactors
Glyma.12G109800	O-methyltransferase	Miscellaneous
Glyma.13G254300	Unknown	Miscellaneous
Glyma.20G196900	SUPEROXIDE DISMUTASE [FE] 2, CHLOROPLASTIC	Oxidation-reduction process
Glyma.04G017500	Catalase	Oxidation-reduction process
Glyma.05G082200	NB-ARC domain (NB-ARC) // Arabidopsis broad-spectrum mildew resistance protein RPW8	Regulatory proteins
Glyma.09G044200	Translationally controlled tumour protein	Regulatory proteins
Glyma.07G189800	F-BOX/LEUCINE RICH REPEAT PROTEIN	Regulatory proteins
Glyma.15G148900	Translationally controlled tumour protein	Regulatory proteins
Glyma.04G039700	Zinc finger, C3HC4 type (RING finger)	Regulatory proteins
Glyma.12G217400	DEHYDRATION-RESPONSIVE PROTEIN RD22	Response to stress
Glyma.12G217300	DEHYDRATION-RESPONSIVE PROTEIN RD22	Response to stress
Glyma.10G285900	TRANSCRIPTION FACTOR TCP21-RELATED	Transcription
Glyma.16G207900	Histone deacetylation protein Rxt3	Transcription
Glyma.05G015100	PROTEIN DR1 HOMOLOG	Transcription
Glyma.10G058500	Splicing factor 3b, subunit 4	Translation
Glyma.15G271800	EUKARYOTIC TRANSLATION INITIATION FACTOR 3 SUBUNIT (EIF-3)	Translation
Glyma.14G061500	AQUAPORIN PIP1-4-RELATED	Transport and catabolism
Glyma.19G242800	Protein of Unknown function (DUF1517)	Unknown
Glyma.08G056200	Protein of Unknown function (DUF760)	Unknown
Upregulated in N7001 and TJS2049
GlymaID		Category
Glyma.03G069400	Glutamate-5-semialdehyde dehydrogenase/Glutamate 5-kinase	Amino acid metabolism
Glyma.03G137900	Galactinol-sucrose galactosyltransferase / Raffinose synthase	Carbohydrate metabolism
Glyma.17G237100	Gibberellin regulated protein	Cell division, cell growth, cell differentiation
Glyma.05G161600	Glutathione S-transferase, C-terminal domain	Detoxification
Glyma.10G243800	EARLY LIGHT-INDUCED PROTEIN 1, CHLOROPLASTIC-RELATED	Energy metabolism
Glyma.15G016300	Photosystem I reaction centre subunit VI	Energy metabolism
Glyma.09G185500	Dehydrin	HSP, chaperones and cell protection
Glyma.09G185500	Dehydrin	HSP, chaperones and cell protection
Glyma.09G185500	Dehydrin	HSP, chaperones and cell protection
Glyma.19G114700	KS-type dehydrin SLTI629 [Glycine max]	HSP, chaperones and cell protection
Glyma.16G038000	Dehydrin	HSP, chaperones and cell protection
Glyma.13G363300	Late embryogenesis abundant protein	HSP, chaperones and cell protection
Glyma.07G090400	Dehydrin	HSP, chaperones and cell protection
Glyma.14G063700	Hsp20/alpha crystallin family	HSP, chaperones and cell protection
Glyma.06G013800	Phosphatidylinositol 3- and 4-kinase	Lipid metabolism
Glyma.13G256700	Magnesium-dependent phosphatase 1	Macromolecule modification/kinases and phosphatases
Glyma.13G165300	Protein phosphatase 2C	Macromolecule modification/kinases and phosphatases
Glyma.14G142300	ATP-DEPENDENT Protease CEREBLON	Macromolecule modification/proteases or protease inhibitors
Glyma.18G231400	Bowman-Birk serine Protease inhibitor family	Macromolecule modification/proteases or protease inhibitors
Glyma.20G205900	Potato inhibitor I family	Macromolecule modification/proteases or protease inhibitors
Glyma.08G235300	Trypsin and Protease inhibitor	Macromolecule modification/proteases or protease inhibitors
Glyma.08G235400	Trypsin and Protease inhibitor	Macromolecule modification/proteases or protease inhibitors
Glyma.10G184600	Potato inhibitor I family	Macromolecule modification/proteases or protease inhibitors
Glyma.01G233500	Nuclease-related domain	Miscellaneous
Glyma.01G161500	Thiosulfate sulfurtransferase / Thiosulfate thiotransferas	Miscellaneous
Glyma.08G213000	POST-ILLUMINATION CHLOROPHYLL FLUORESCENCE INCREASE PROTEIN	Miscellaneous
Glyma.05G091600	FE(II)/ ASCORBATE OXIDASE SUPERFAMILY	Oxidation-reduction process
Glyma.07G168500	2,4-dihydroxy-1,4-benzoxazin-3-one-glucoside dioxygenase / DIBOA-Glc dioxygenase	Oxidation-reduction process
Glyma.08G103400	Kelch motif	Regulatory proteins
Glyma.16G036400	BTB/POZ domain	Regulatory proteins
Glyma.03G046300	Macrophage migration inhibitory factor (MIF)	Regulatory proteins
Glyma.07G243500	Pathogenesis-related protein Bet v I family	Response to stress
Glyma.17G030200	Pathogenesis-related protein Bet v I family	Response to stress
Glyma.20G167500	ABA/WDS induced protein	Response to stress
Glyma.07G183000	COILED-COIL-HELIX-COILED-COIL-HELIX DOMAIN CONTAINING 2/NUR77	Transcription
Glyma.15G040400	Histone-like transcription factor (CBF/NF-Y) and archaeal histone	Transcription
Glyma.02G203700	TRANSLATION INITIATION FACTOR 5A-RELATED	Translation
Glyma.07G121900	ABC transporter	Transport and catabolism
Glyma.20G133800	VACUOLAR-SORTING RECEPTOR 3-RELATED	Transport and catabolism
Glyma.04G198600	BIDIRECTIONAL SUGAR TRANSPORTER SWEET10	Transport and catabolism
Glyma.01G019800	Protein of Unknown function (DUF1399)	Unknown
Glyma.12G083200	Protein of Unknown function C-terminus (DUF2451)	Unknown
